# Supplementary material for: Two novel metal–organic frameworks constructed by pyridinyl-derived and carboxylate mixed ligands for photocatalytic dye degradation
Source: Royal Society of Chemistry journal article supplement (doi:10.1039/d2nj05751d), 2023-01-01
Supplement: d2nj05751d1.pdf [file d2nj05751d1.pdf]

## Electronic Supplementary Material (ESI)

### **Two novel metal-organic frameworks constructed by pyridinyl-derived and carboxylate mixed ligands for photocatalytic dye degradation**

Chixiao Ma<sup>a,c</sup>, Junyong Zhang,<sup>\*a</sup> Hao Xu,<sup>a</sup> Xianghua Zeng,<sup>a</sup> Chunhua Gong<sup>\*b</sup> and Jingli Xie<sup>\*a</sup>

Supplementary Figures and Tables.

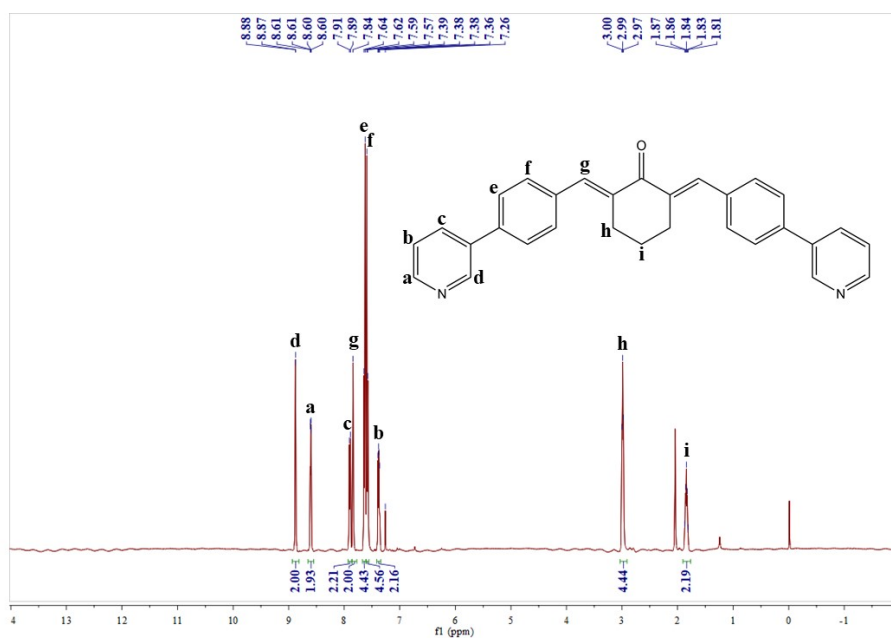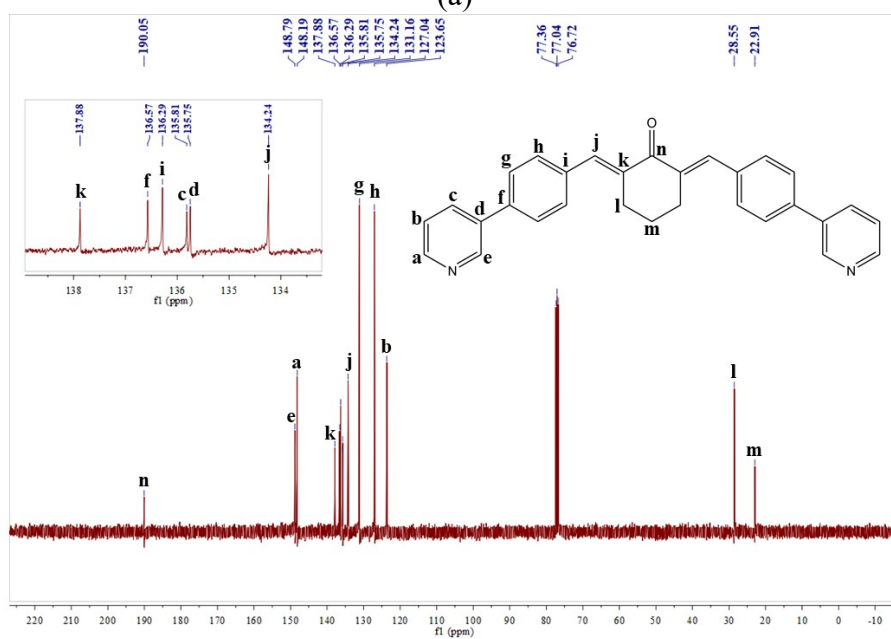

**Fig. S1** (a)  $^1\text{H}$  NMR spectrum of L. (b)  $^{13}\text{C}$  NMR spectrum of L.

**Table S1** Crystallographic data for **L**, **1** and **2**.

| Compound                                                                             | <b>L</b>                                          | <b>1</b>                                                        | <b>2</b>                                                        |
|--------------------------------------------------------------------------------------|---------------------------------------------------|-----------------------------------------------------------------|-----------------------------------------------------------------|
| Empirical formula                                                                    | C <sub>30</sub> H <sub>24</sub> N <sub>2</sub> O  | C <sub>39</sub> H <sub>30</sub> ZnN <sub>2</sub> O <sub>5</sub> | C <sub>39</sub> H <sub>30</sub> CdN <sub>2</sub> O <sub>5</sub> |
| Formula weight                                                                       | 428.51                                            | 672.02                                                          | 719.05                                                          |
| Temperature (K)                                                                      | 296(2)                                            | 296(2)                                                          | 296(2)                                                          |
| Crystal system                                                                       | Monoclinic                                        | Triclinic                                                       | Triclinic                                                       |
| Space group                                                                          | <i>P</i> 2 <sub>1</sub> / <i>c</i>                | <i>P</i> $\bar{1}$                                              | <i>P</i> $\bar{1}$                                              |
| <i>a</i> (Å)                                                                         | 10.3942(4)                                        | 9.1906(8)                                                       | 9.2944(6)                                                       |
| <i>b</i> (Å)                                                                         | 8.7315(4)                                         | 9.9930(8)                                                       | 10.2181(4)                                                      |
| <i>c</i> (Å)                                                                         | 24.6346(10)                                       | 17.5968(15)                                                     | 17.8346(8)                                                      |
| $\alpha$ (°)                                                                         | 90                                                | 100.867(7)                                                      | 74.259(4)                                                       |
| $\beta$ (°)                                                                          | 101.023(4)                                        | 91.850(7)                                                       | 87.391(4)                                                       |
| $\gamma$ (°)                                                                         | 90                                                | 105.456(7)                                                      | 73.980(5)                                                       |
| <i>V</i> (Å <sup>3</sup> )                                                           | 2194.51(16)                                       | 1523.9(2)                                                       | 1566.15(15)                                                     |
| <i>Z</i>                                                                             | 4                                                 | 2                                                               | 2                                                               |
| <i>D</i> <sub>c</sub> (g·cm <sup>-3</sup> )                                          | 1.297                                             | 1.465                                                           | 1.525                                                           |
| $\mu$ (mm <sup>-1</sup> )                                                            | 0.613                                             | 0.857                                                           | 0.747                                                           |
| <i>F</i> (000)                                                                       | 904.0                                             | 696.0                                                           | 732.0                                                           |
| Radiation                                                                            | Cu- <i>K</i> $\alpha$<br>( $\lambda$ = 1.54184 Å) | Mo- <i>K</i> $\alpha$<br>( $\lambda$ = 0.71073 Å)               | Mo- <i>K</i> $\alpha$<br>( $\lambda$ = 0.71073 Å)               |
| Reflections collected                                                                | 7733                                              | 13116                                                           | 13318                                                           |
| Independent reflections                                                              | 4239                                              | 7113                                                            | 7229                                                            |
| <i>R</i> <sub>int</sub>                                                              | 0.0276                                            | 0.0805                                                          | 0.0504                                                          |
| GOF on <i>F</i> <sup>2</sup>                                                         | 1.021                                             | 0.827                                                           | 0.854                                                           |
| <i>R</i> <sub>1</sub> / <i>wR</i> <sub>2</sub> [ <i>I</i> > 2 $\sigma$ ( <i>I</i> )] | 0.0467/0.1141                                     | 0.0585/0.0693                                                   | 0.0490/0.0538                                                   |
| <i>R</i> <sub>1</sub> / <i>wR</i> <sub>2</sub> (all data)                            | 0.0742/0.1296                                     | 0.1750/0.1091                                                   | 0.1048/0.0616                                                   |

**Table S2** Selected bond lengths (Å) and angles (°) for compound **1**

| Compound <b>1</b>                       |            |                          |            |
|-----------------------------------------|------------|--------------------------|------------|
| Zn1-N2                                  | 2.162(4)   | Zn1-N1 <sup>iii</sup>    | 2.174(4)   |
| Zn1-O2                                  | 2.012(3)   | Zn1-O3 <sup>i</sup>      | 2.040(3)   |
| Zn1-O4 <sup>ii</sup>                    | 2.081(3)   | Zn1-O5 <sup>ii</sup>     | 2.363(4)   |
| N1 <sup>iii</sup> -Zn1-O5 <sup>ii</sup> | 87.17(14)  | N2-Zn1-O5 <sup>ii</sup>  | 89.35(14)  |
| N2-Zn1-N1 <sup>iii</sup>                | 172.02(16) | O2-Zn1-N1 <sup>iii</sup> | 85.20(13)  |
| O2-Zn1-N2                               | 87.77(13)  | O2-Zn1-O3 <sup>i</sup>   | 120.60(13) |
| O2-Zn1-O4 <sup>ii</sup>                 | 151.03(14) | O2-Zn1-O5 <sup>ii</sup>  | 92.51(12)  |
| O3 <sup>i</sup> -Zn1-N1 <sup>iii</sup>  | 91.34(15)  | O3 <sup>i</sup> -Zn1-N2  | 95.51(15)  |

|                                         |           |                                       |            |
|-----------------------------------------|-----------|---------------------------------------|------------|
| O3 <sup>i</sup> -Zn1-O4 <sup>ii</sup>   | 88.34(13) | O3 <sup>i</sup> -Zn1-O5 <sup>ii</sup> | 146.63(12) |
| O4 <sup>ii</sup> -Zn1-N1 <sup>iii</sup> | 93.53(14) | O4 <sup>ii</sup> -Zn1-N2              | 90.78(13)  |
| O4 <sup>ii</sup> -Zn1-O5 <sup>ii</sup>  | 58.53(12) |                                       |            |

Symmetry codes: (i) 1-x, -y, 2-z; (ii) x, 1+y, z; (iii) x-1, y-1, 1+z.

**Table S3** Selected bond lengths (Å) and angles (°) for compound **2**.

| Compound <b>2</b>                      |            |                                         |           |
|----------------------------------------|------------|-----------------------------------------|-----------|
| Cd1-N1 <sup>ii</sup>                   | 2.351(3)   | Cd1-N2                                  | 2.328(3)  |
| Cd1-O2                                 | 2.243(2)   | Cd1-O3 <sup>iii</sup>                   | 2.256(3)  |
| Cd1-O4 <sup>i</sup>                    | 2.3296(19) | Cd1-O5 <sup>i</sup>                     | 2.376(2)  |
| N1 <sup>ii</sup> -Cd1-O5 <sup>i</sup>  | 90.21(9)   | N2-Cd1-O5 <sup>i</sup>                  | 91.90(9)  |
| N2-Cd1-N1 <sup>ii</sup>                | 171.61(9)  | N2-Cd1-O4 <sup>i</sup>                  | 88.64(9)  |
| O2-Cd1-N1 <sup>ii</sup>                | 85.16(9)   | O2-Cd1-N2                               | 86.73(9)  |
| O2-Cd1-O3 <sup>iii</sup>               | 130.03(8)  | O2-Cd1-O4 <sup>i</sup>                  | 144.55(9) |
| O2-Cd1-O5 <sup>i</sup>                 | 89.64(8)   | O3 <sup>iii</sup> -Cd1-N1 <sup>ii</sup> | 92.58(10) |
| O3 <sup>iii</sup> -Cd1-N2              | 90.97(10)  | O3 <sup>iii</sup> -Cd1-O4 <sup>i</sup>  | 85.13(8)  |
| O3 <sup>iii</sup> -Cd1-O5 <sup>i</sup> | 140.33(8)  | O4 <sup>i</sup> -Cd1-N1 <sup>ii</sup>   | 99.23(9)  |
| O4 <sup>i</sup> -Cd1-O5 <sup>i</sup>   | 58.53(12)  |                                         |           |

Symmetry codes: (i) x, y-1, z; (ii) x-1, 1+y, 1+z; (iii) 1-x, 2-y, 2-z;

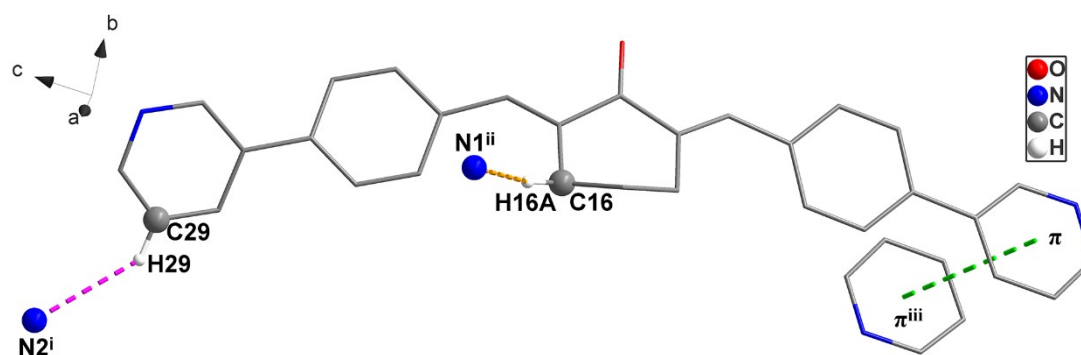

**Fig. S2** Hydrogen bonding interactions in **L**.

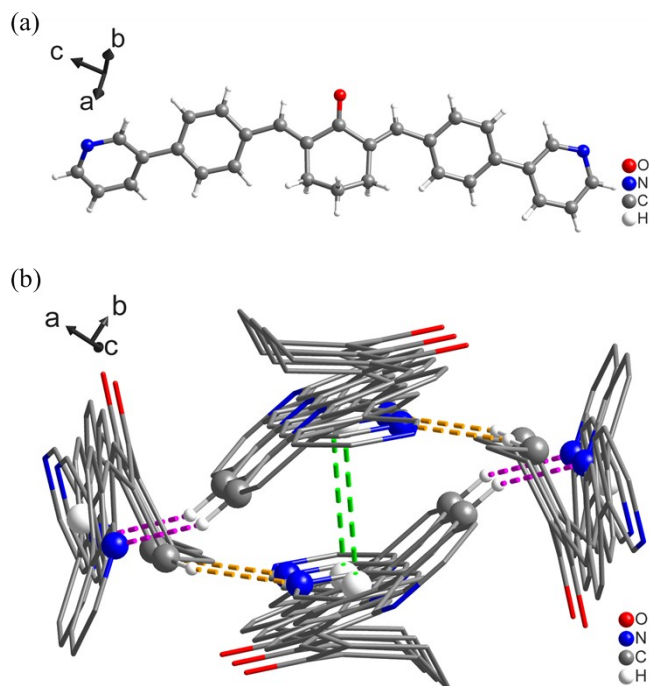

**Fig. S3** (a) The structure of **L**. (b) The packing mode of **L** by hydrogen bonding interactions.

**Table S4** The hydrogen-bonding geometry ( $\text{\AA}$ ,  $^\circ$ ) of **L**.

| D-H $\cdots$ A                     | d(D-H) | d(H $\cdots$ A) | d(D $\cdots$ A) | $\angle$ D-H $\cdots$ A |
|------------------------------------|--------|-----------------|-----------------|-------------------------|
| C29-H29 $\cdots$ N2 <sup>i</sup>   | 0.93   | 2.74            | 3.48(2)         | 137                     |
| C16-H16A $\cdots$ N1 <sup>ii</sup> | 0.97   | 2.57            | 3.48(2)         | 156                     |

Symmetry codes: (i)  $2-x, y-1/2, 3/2-z$ ; (ii)  $1+x, 3/2-y, 1/2+z$ .

**Table S5** The  $\pi\cdots\pi$  interactions ( $\text{\AA}$ ,  $^\circ$ ) for the **L**.

| Compound | $\pi\cdots\pi$ interaction                        | cent $\cdots$ cent ( $\text{\AA}$ ) | dihedral angle ( $^\circ$ ) |
|----------|---------------------------------------------------|-------------------------------------|-----------------------------|
| <b>L</b> | $\pi(\text{Py})\cdots\pi(\text{Py})^{\text{iii}}$ | 3.90                                | 0                           |

Symmetry codes: (iii)  $-x, 1-y, -z$ .

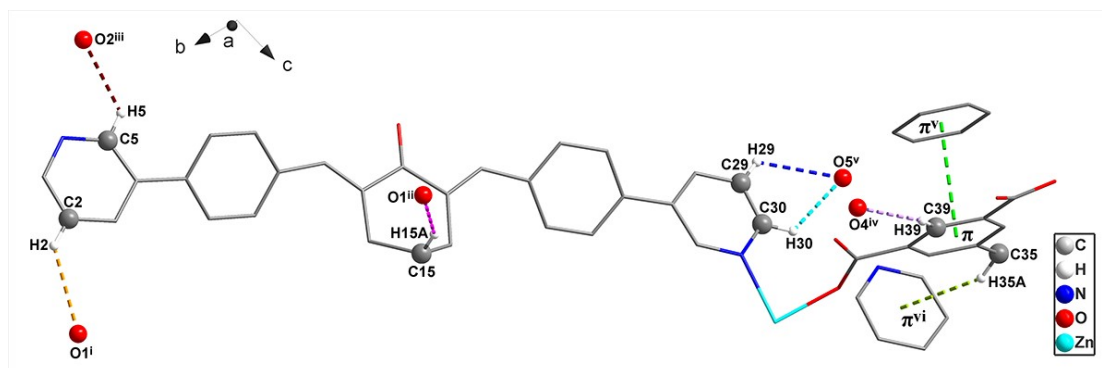

**Fig. S4** Hydrogen bonding interactions in **1**.

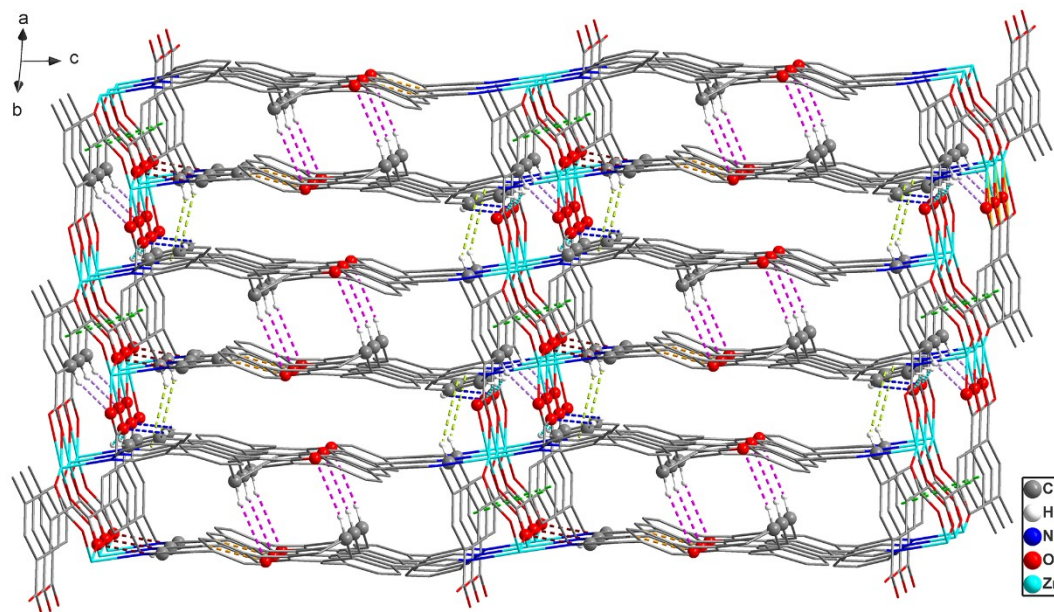

**Fig. S5** 3D supramolecular framework of **1** formed by the weak interactions.

**Table S6** The hydrogen-bonding geometry (Å, °) of compound **1**.

| D–H···A                        | d(D–H) | d(H···A) | d(D···A) | ∠D–H···A |
|--------------------------------|--------|----------|----------|----------|
| C2–H2···O1 <sup>i</sup>        | 0.93   | 2.55     | 3.21(2)  | 128      |
| C15–H15···O1 <sup>ii</sup>     | 0.97   | 2.71     | 3.58(4)  | 149      |
| C5–H5···O2 <sup>iii</sup>      | 0.93   | 2.31     | 2.88(3)  | 120      |
| C39–H39···O4 <sup>iv</sup>     | 0.93   | 2.70     | 3.60(4)  | 162      |
| C29–H29···O5 <sup>v</sup>      | 0.93   | 2.62     | 3.23(2)  | 123      |
| C30–H30···O5 <sup>v</sup>      | 0.93   | 2.61     | 3.24(3)  | 125      |
| C35–H35A···π(Ph) <sup>vi</sup> | 0.96   | 2.99     | 3.86(5)  | 150      |

Symmetry codes: (i) 1+x, 1+y, z; (ii) 2-x, 1-y, 1-z; (iii) 1+x, 1+y, z-1; (iv) 1-x, -1-y, 2-z; (v) -x, -1-y, 2-z; (vi) -x, -y, 2-z.

**Table S7** The π···π interactions (Å, °) for compound **1**.

| Compound | π···π interaction          | cent···cent (Å) | dihedral angle (°) |
|----------|----------------------------|-----------------|--------------------|
| <b>1</b> | π(Ph)···π(Ph) <sup>v</sup> | 3.61            | 0                  |

Symmetry codes: (v) -x, -1-y, 2-z.

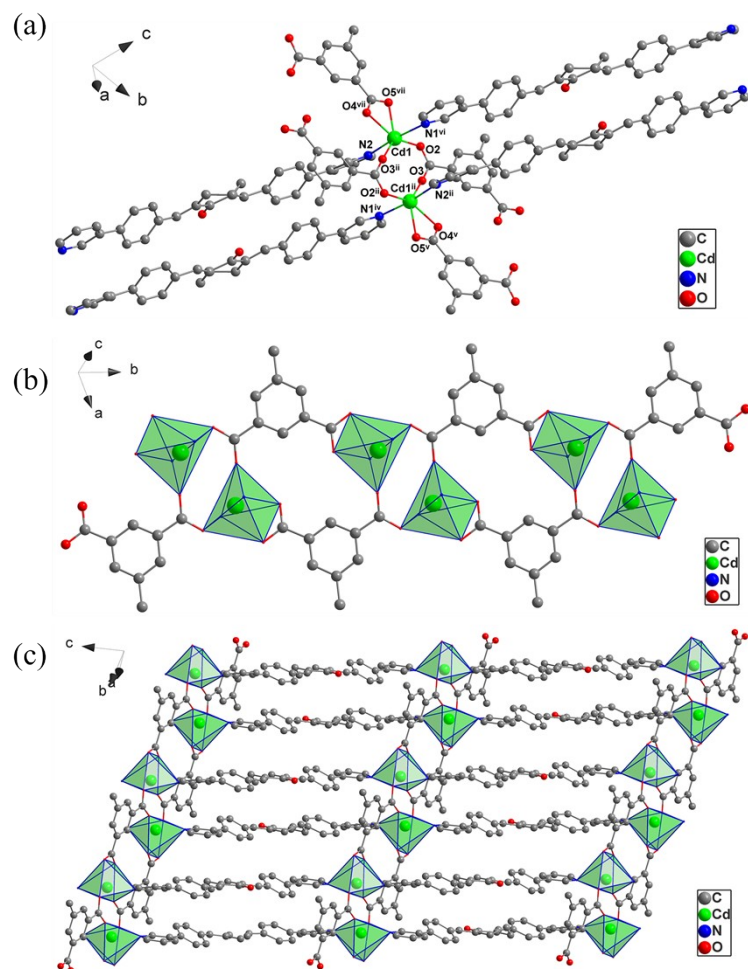

**Fig. S6** Structure of compound **2**: (a) The coordination environment of  $\text{Cd}^{2+}$  ion. (b) Trapezoidal chain. (c) 2D layer structure.

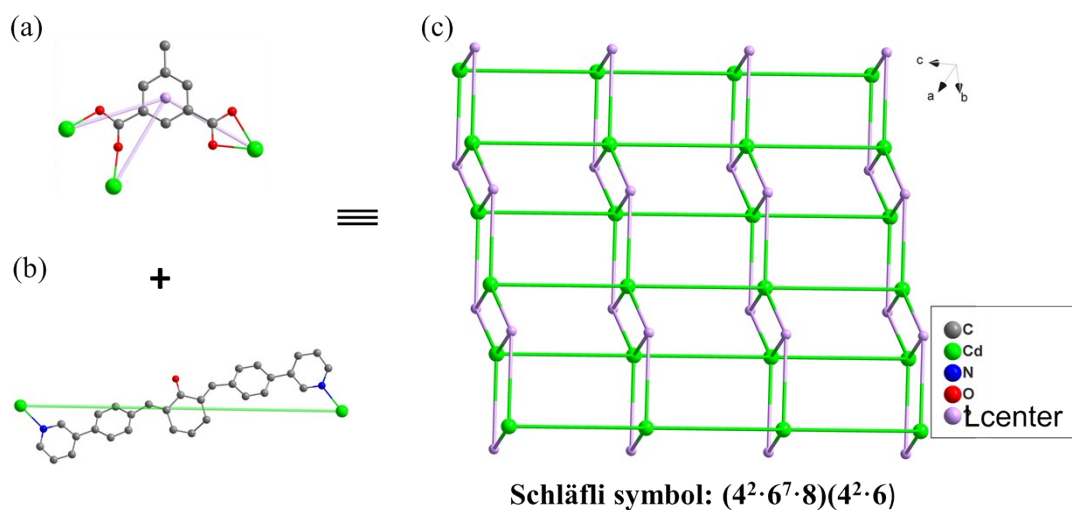

**Fig. S7** Topological simplification diagram of compound **2**.



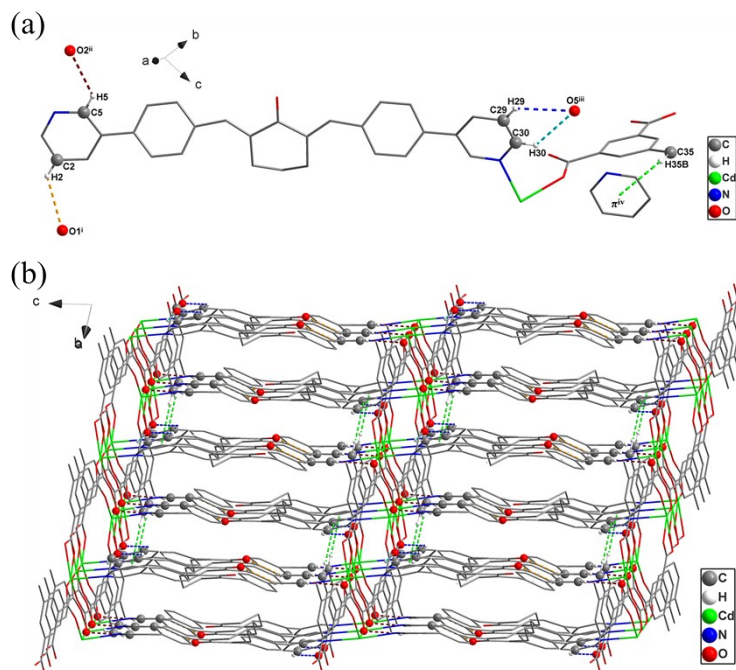

**Fig. S8** (a) Hydrogen bonding interactions in **2**. (b) 3D supramolecular framework of **1** formed by the weak interactions.

**Table S8** The hydrogen-bonding geometry ( $\text{\AA}$ ,  $^\circ$ ) of compound **2**.

| D–H $\cdots$ A                             | d(D–H) | d(H $\cdots$ A) | d(D $\cdots$ A) | $\angle$ D–H $\cdots$ A |
|--------------------------------------------|--------|-----------------|-----------------|-------------------------|
| C2–H2 $\cdots$ O1 <sup>i</sup>             | 0.93   | 2.56            | 3.23(5)         | 129                     |
| C5–H5 $\cdots$ O2 <sup>ii</sup>            | 0.93   | 2.41            | 3.06(5)         | 127                     |
| C29–H29 $\cdots$ O5 <sup>iii</sup>         | 0.93   | 2.70            | 3.32(6)         | 125                     |
| C30–H30 $\cdots$ O5 <sup>iii</sup>         | 0.93   | 2.72            | 3.35(6)         | 125                     |
| C35–H35B $\cdots$ $\pi$ (Py) <sup>vi</sup> | 0.96   | 3.13            | 4.00(6)         | 167                     |

Symmetry codes: (i)  $1+x, y-1, z$ ; (ii)  $1+x, y-1, z-1$ ; (iii)  $-x, 3-y, 2-z$ ; (iv)  $1-x, -1-y, 2-z$ ; (v)  $-x, 2-y, 2-z$ .

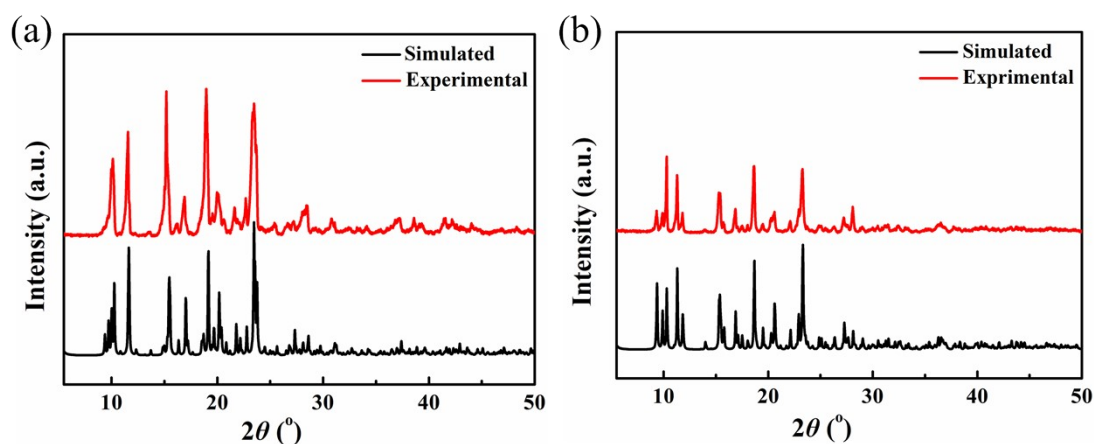

**Fig. S9** (a) PXRD patterns of **1**; (b) PXRD patterns of **2**.



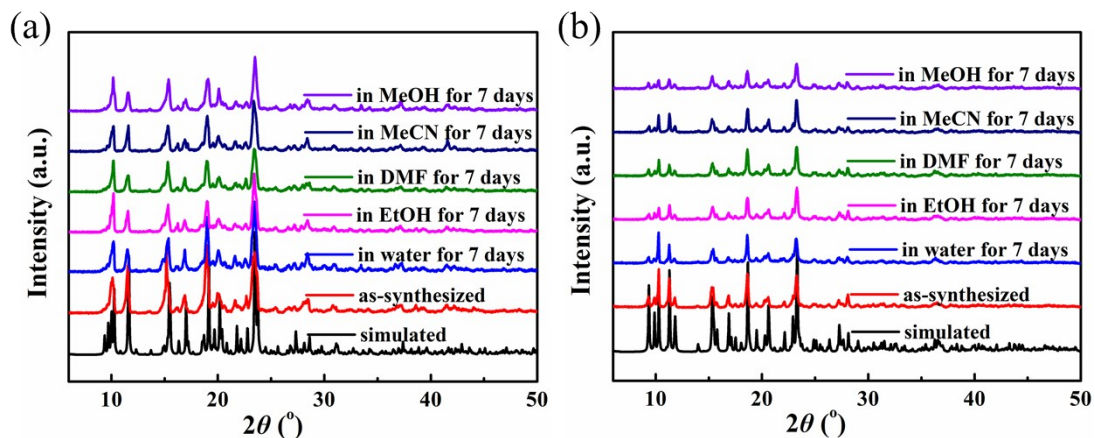

**Fig. S10** (a) PXRD patterns of **1** after soaking in different solvents for a week. (b) PXRD patterns of **2** after soaking in different solvents for a week.

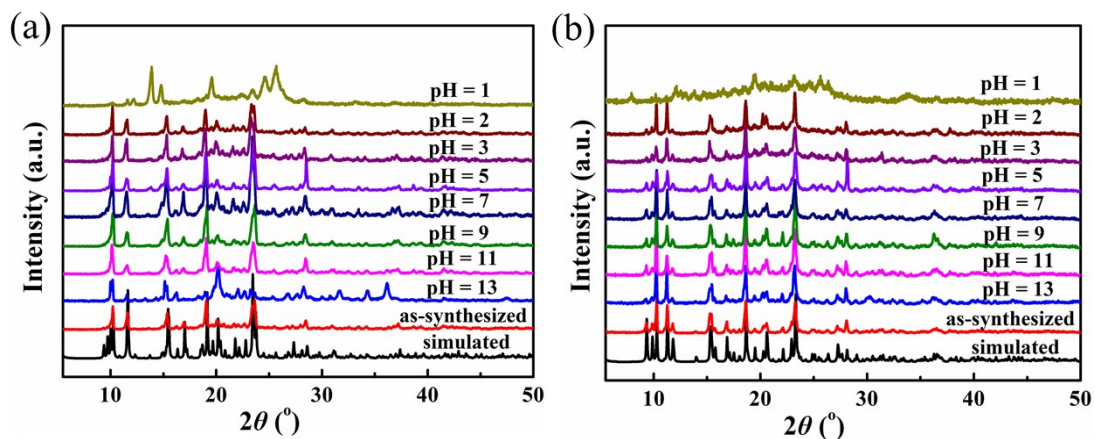

**Fig. S11** (a) PXRD patterns of **1** after soaking in different pH solutions for three days. (b) PXRD patterns of **2** after soaking in different pH solutions for three days.

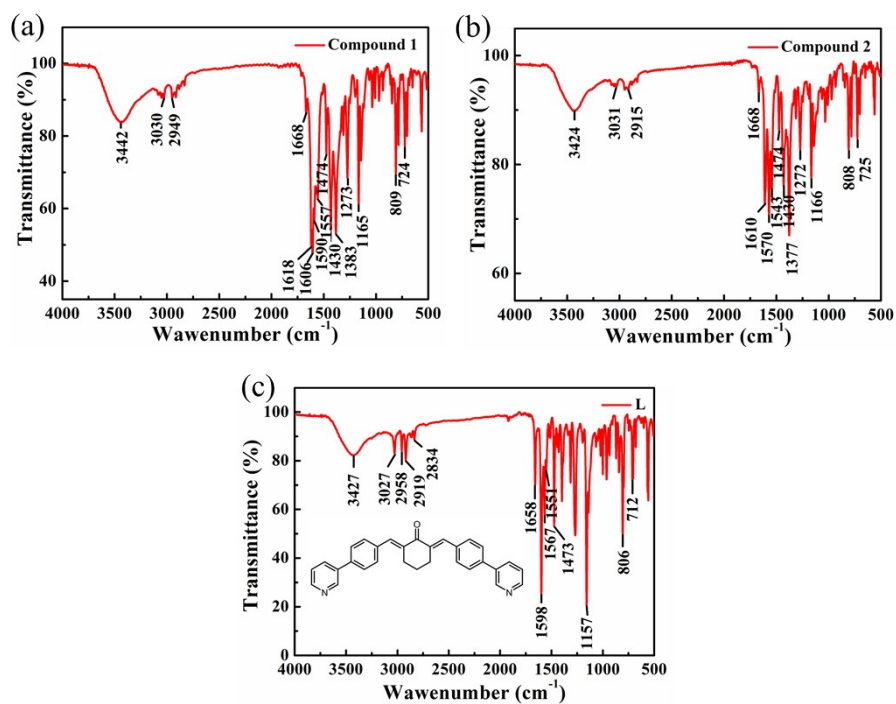

**Fig. S12** (a) IR spectrum of **1**. (b) IR spectrum of **2**. (c) IR spectrum of **L**.

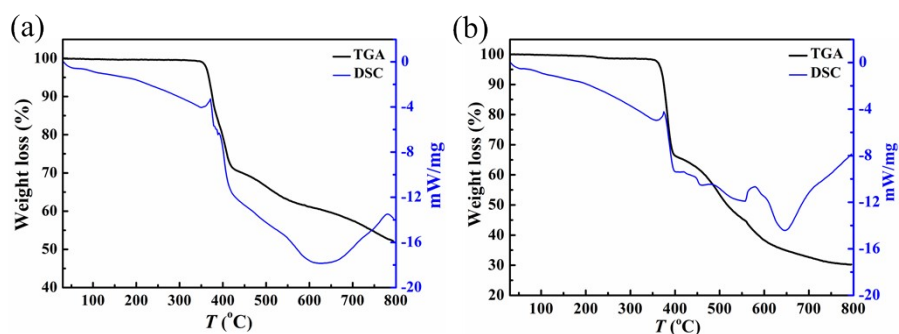

**Fig. S13** (a) TG curve of **1**. (b) TG curve of **2**.

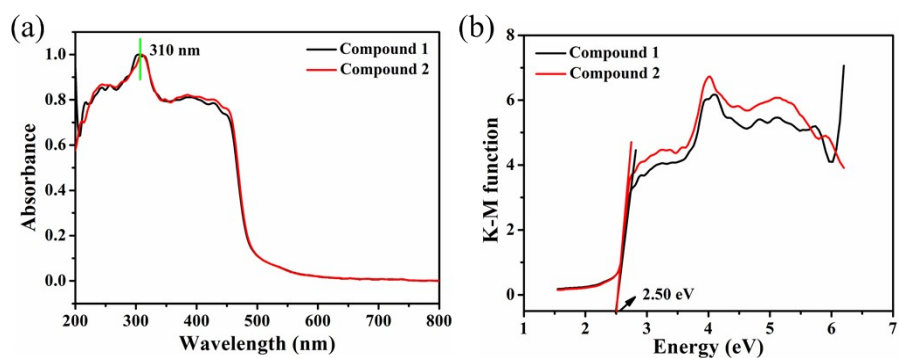

**Fig. S14** (a) UV-*vis* DRS spectra of **1** and **2**. (b) Tauc plot displaying the band gap of **1** and **2**.

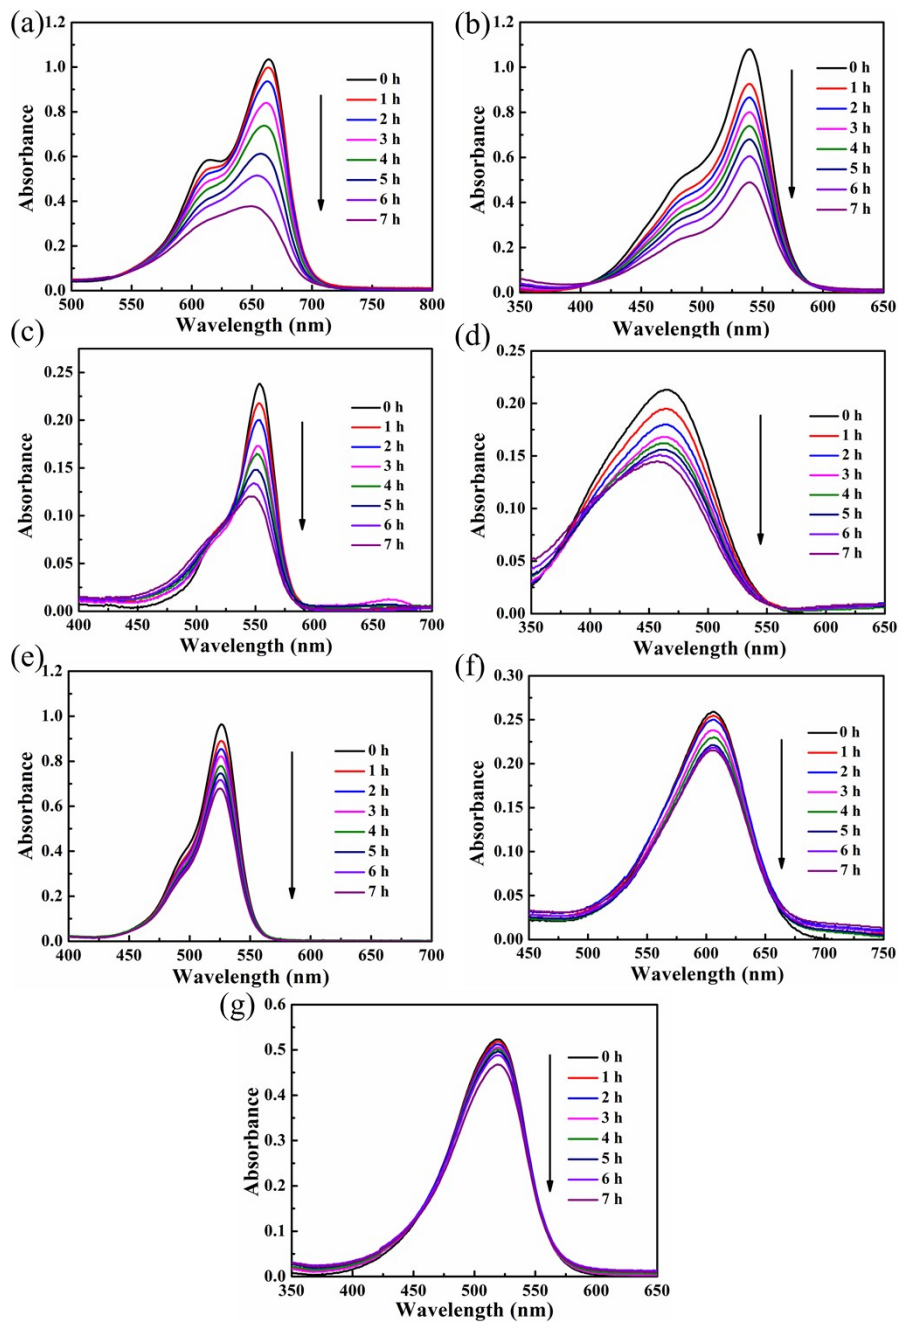

**Fig. S15** Photocatalytic effects of compound 2 on different organic dye solutions: (a) MB, (b) PH, (c) RhB, (d) MO, (e) Rh 6G, (f) Isatin, (g) BR 2.

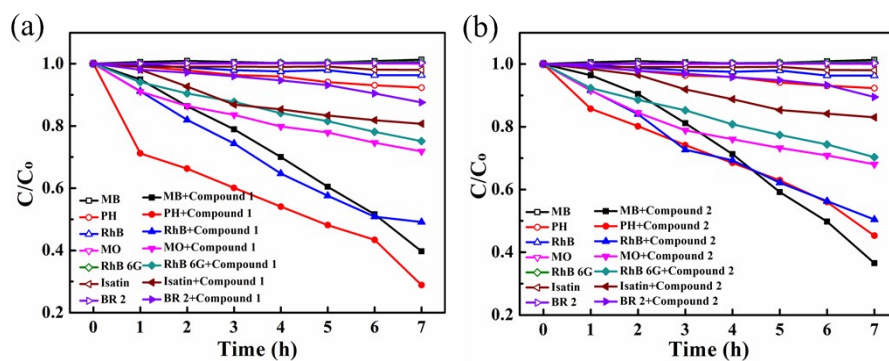

**Fig. S16** The linear relation of concentration ratios ( $C/C_0$ ) to irradiation time (h) for different organic dye solutions: (a) in the absence and presence of **1**; (b) in the absence and presence of **2**.

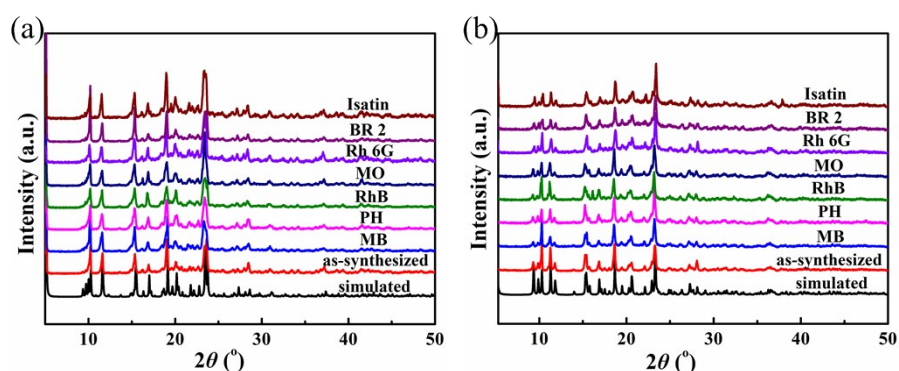

**Fig. S17** (a) PXR patterns of **1** after photocatalysis of different dyes. (b) PXR patterns of **2** after photocatalysis of different dyes.

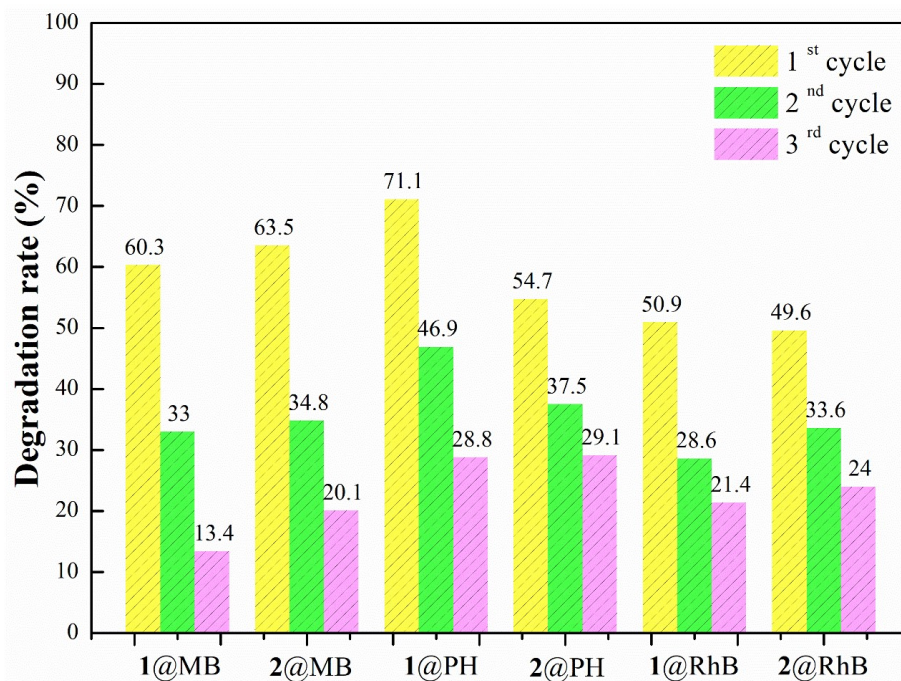

**Fig. S18** Degradation rates of the MB, PH, RhB solutions in the presence of compounds **1** or **2** for three cycles.



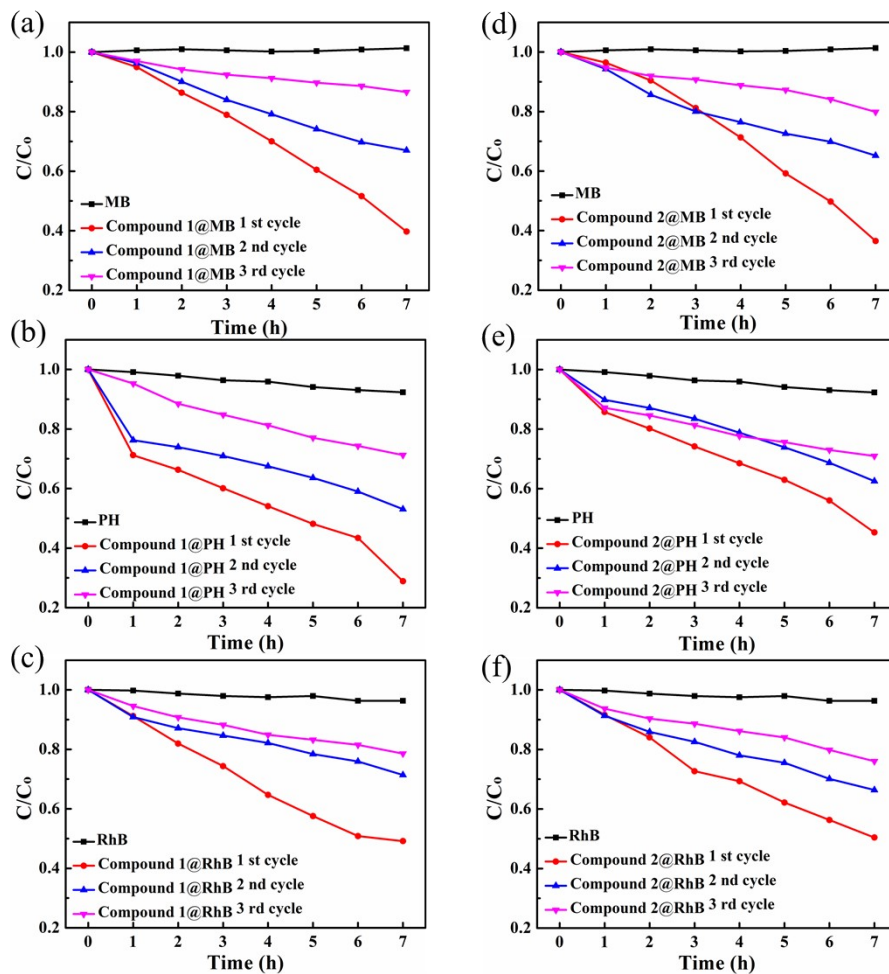

**Fig. S19** The linear relation of concentration ratios ( $C/C_0$ ) to irradiation time (h) for different organic dye solutions: (a) MB, (b) PH, (c) RhB in the absence and presence of **1** for three cycles; (d) MB, (e) PH, (f) RhB in the absence and presence of **2** for three cycles.

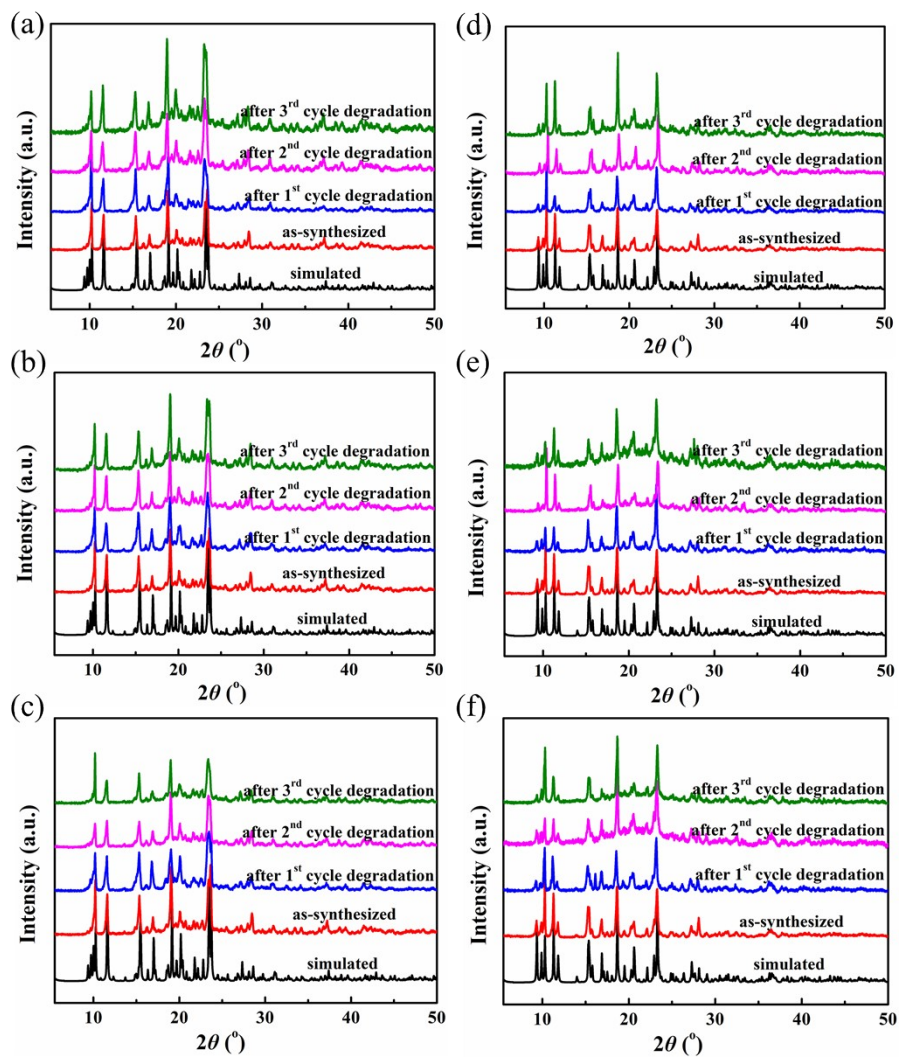

**Fig. S20** PXRD patterns of **1** after photocatalysis of (a) MB, (b) PH, (c) RhB solutions and **2** after photocatalysis of (d) MB, (e) PH, (f) RhB solutions for three cycles.

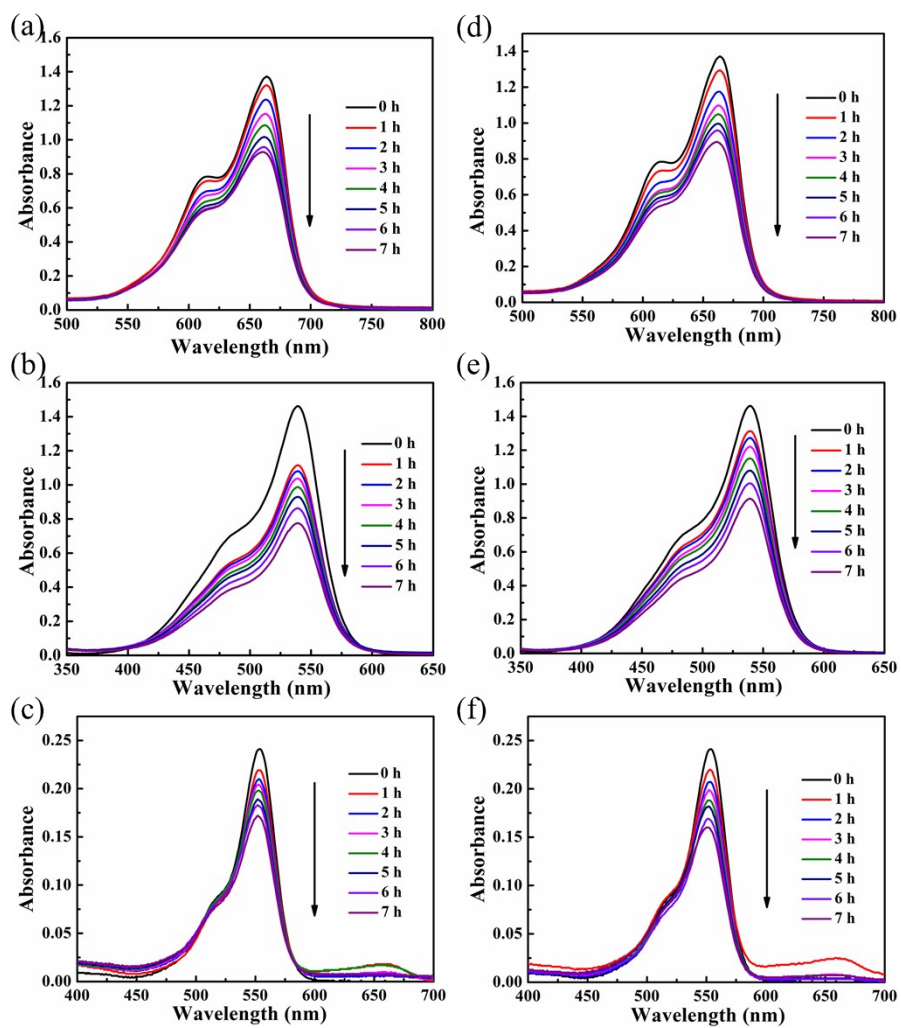

**Fig. S21** Photocatalytic effects of **1** on (a) MB, (b) PH, (c) RhB solutions and **2** on (d) MB, (e) PH, (f) RhB solutions for second cycle.



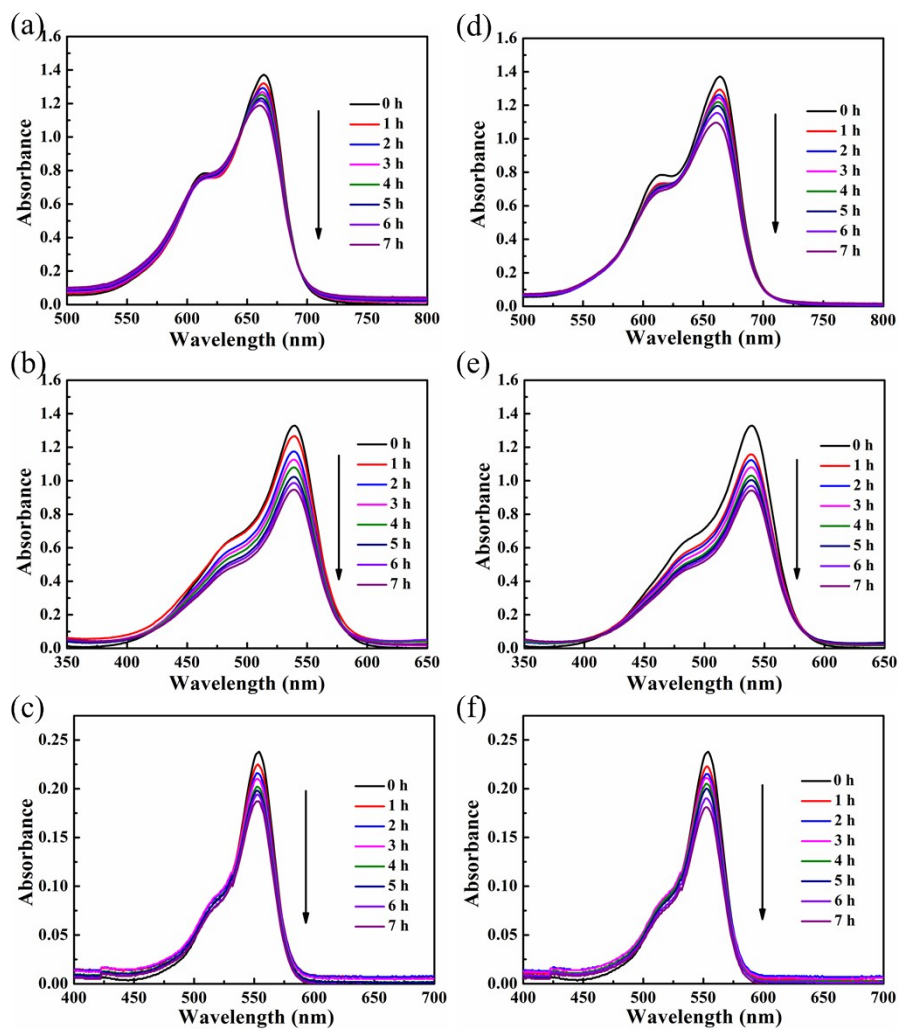

**Fig. S22** Photocatalytic effects of **1** on (a) MB, (b) PH, (c) RhB solutions and **2** on (d) MB, (e) PH, (f) RhB solutions for third cycle.
